# Supplementary material for: Changes in Liver Gene Expression and Plasma Concentration of Rbp4, Fetuin-A, and Fgf21 in Sprague-Dawley Rats Subjected to Different Dietary Interventions and Bariatric Surgery
Source: Hindawi journal article supplement (doi:10.1155/2018/3472190), 2018-08-16
Supplement: f1 [file 3472190.f1.pdf]

Supplementary Material

Table 1. The composition of the diets used in the experiment.

| CONTROL DIET                                         |            | HIGH FAT DIET                                                               |                  |
|------------------------------------------------------|------------|-----------------------------------------------------------------------------|------------------|
| Mouse and rat, breeding                              |            | ssniff® EF R/M acc. D12451 (II) mod. *                                      |                  |
| Standart diet                                        |            | Experimental diet for rats and mice, high fat content (tallow) / DIO series |                  |
| Producer: Provimi Kliba AG, Kaiseraugst, Switzerland |            | Producer: Ssniff Spezialdiäten GmbH, Soest, Germany                         |                  |
| Crude Nutrients                                      |            |                                                                             |                  |
| Dry matter                                           | 88.1 %     | Dry matter                                                                  | 96.9 %           |
| Crude protein                                        | 24.0 %     | Crude protein                                                               | (N x 6.25) 22.5% |
| Crude fat                                            | 4.9 %      | Crude fat                                                                   | 23.1 %           |
| Crude fiber                                          | 4.7 %      | Crude fiber                                                                 | 5.7 %            |
| Crude ash                                            | 7.0 %      | Crude ash                                                                   | 5.9 %            |
| N free extracts                                      | 47.5 %     | N free extracts                                                             | 39.8 %           |
| Gross energy                                         | 16.5 MJ/kg | Gross energy                                                                | 22.1 MJ/kg       |
| Metabol. energy                                      | 13.5 MJ/kg | Metabol. energy                                                             | 19.2 MJ/kg       |
| Starch                                               | 29.0 %     | Starch                                                                      | 8.6 %            |
|                                                      |            | Sugar / Dextrines                                                           | 29.4 %           |
| Amino acids                                          |            |                                                                             |                  |
| Arginine                                             | 1.51 %     | Arginine                                                                    | 0.82 %           |
| Lysine                                               | 1.36 %     | Lysine                                                                      | 1.85 %           |
| Methionine                                           | 0.45 %     | Methionine                                                                  | 0.78 %           |
| Methionine + cystine                                 | 0.82 %     | Met+Cysteine                                                                | 1.13 %           |
| Tryptophan                                           | 0.30 %     | Tryptophan                                                                  | 0.29 %           |
| Threonine                                            | 0.90 %     | Threonine                                                                   | 1.00 %           |
|                                                      |            | Histidine                                                                   | 0.71 %           |
|                                                      |            | Serine                                                                      | 1.34 %           |

|                               |              |                          |              |
|-------------------------------|--------------|--------------------------|--------------|
|                               |              | Alanine                  | 0.74 %       |
|                               |              | Proline                  | 2.59 %       |
|                               |              | Aspartic acid            | 1.68 %       |
|                               |              | Glutamic acid            | 5.08 %       |
|                               |              | Glycine                  | 0.47 %       |
|                               |              | Phe+Tyr                  | 2.41 %       |
|                               |              | Phenylalanine            | 1.21 %       |
|                               |              | Leucine                  | 2.22 %       |
|                               |              | Isoleucine               | 1.18 %       |
|                               |              | Valine                   | 1.54 %       |
|                               |              | Cystine                  | 0.35 %       |
| <b>Major mineral elements</b> |              |                          |              |
| Calcium                       | 1.20 %       | Calcium                  | 1.05 %       |
| Phosphorus                    | 0.83 %       | Phosphorus               | 0.69 %       |
| Magnesium                     | 0.22 %       | Magnesium                | 0.15 %       |
| Sodium                        | 0.23 %       | Sodium                   | 0.20 %       |
| Potassium                     | 0.95 %       | Potassium                | 0.72 %       |
| Chlorine                      | 0.41 %       |                          |              |
| <b>Trace elements</b>         |              |                          |              |
| Iron                          | 250 mg/kg    | Iron                     | 122 mg/kg    |
| Zinc                          | 64 mg/kg     | Zinc                     | 50 mg/kg     |
| Copper                        | 15 mg/kg     | Copper                   | 10 mg/kg     |
| Iodine                        | 1.2 mg/kg    | Iodine                   | 0.85 mg/kg   |
| Manganese                     | 55 mg/kg     | Manganese                | 72 mg/kg     |
| Selenium                      | 0.3 mg/kg    | Selenium                 | 0.12 mg/kg   |
| <b>Vitamins</b>               |              |                          |              |
| Vitamin A                     | 12 000 IU/kg | Vitamin A                | 15 000 IU/kg |
| Vitamin D3                    | 1'000 IU/kg  | Vitamin D3               | 1.500 IU/kg  |
| Vitamin E                     | 95 mg/kg     | Vitamin E                | 150 mg/kg    |
| Vitamin K3                    | 4 mg/kg      | Vitamin K (as menadione) | 20 mg/kg     |
| Vitamin B1                    | 22 mg/kg     | Thiamin (B1)             | 16 mg/kg     |

|                    |             |                                |             |
|--------------------|-------------|--------------------------------|-------------|
| Vitamin B2         | 13 mg/kg    | Riboflavin (B2)                | 16 mg/kg    |
| Vitamin B6         | 10 mg/kg    | Pyridoxine (B6)                | 18 mg/kg    |
| Vitamin B12        | 0.05 mg/kg  | Cobalamin (B12)                | 0.030 mg/kg |
| Nicotinic acid     | 70 mg/kg    | Nicotinic acid                 | 45 mg/kg    |
| Pantothenic        | 30 mg/kg    | Pantothenic acid               | 55 mg/kg    |
| Folic acid         | 3 mg/kg     | Folic acid                     | 19 mg/kg    |
| Biotin             | 0.26 mg/kg  | Biotin                         | 0.305 mg/kg |
| Choline            | 1'800 mg/kg | Choline-Chloride               | 1,050 mg    |
| Vitamin C          | 36 mg/kg    | Vitamin C                      | 30 mg/kg    |
|                    |             | Inositol                       | 80 mg       |
| <b>Fatty acids</b> |             |                                |             |
|                    |             | C 8:0                          | —           |
|                    |             | C10:0                          | —           |
|                    |             | C12:0                          | 0.02 %      |
|                    |             | C14:0                          | 0.69 %      |
|                    |             | C16:0                          | 5.39 %      |
|                    |             | C16:1                          | 0.52 %      |
|                    |             | C17:0                          | 0.25 %      |
|                    |             | C18:0                          | 3.75 %      |
|                    |             | C18:1                          | 8.17 %      |
|                    |             | C18:2                          | 1.84 %      |
|                    |             | C18:3                          | 0.25 %      |
|                    |             | C20:0                          | 0.03 %      |
|                    |             | C20:1                          | 0.01 %      |
|                    |             | C20:4                          | 0.05 %      |
|                    |             | C20:5                          | —           |
|                    |             | C22:6                          | —           |
|                    |             | Cholesterol (original content) | 194 mg/kg   |
